**S2 Table: List of data points and possible answers collected from each venue during the assessment visits.** These data points in conjunction with direct observations and photographic records were with the score sheet to estimate a welfare score for each venue.

| Category                              | Values                                                                                                                                                         |
|---------------------------------------|----------------------------------------------------------------------------------------------------------------------------------------------------------------|
| Visitor numbers                       | <50; 50-200; 201-500; >500                                                                                                                                     |
| Visitor number source                 | Venue staff; 1 hour monitoring; Personal estimate                                                                                                              |
| Education                             | No education; Basic; Comprehensive                                                                                                                             |
| Education content                     | Species information; Conservation; Animal welfare; Cultural use; Other                                                                                         |
| Venue established                     | > 5 years; ≤ 5 years; Unknown                                                                                                                                  |
| Communicated animal welfare awareness | Strong; Moderate; Slight; None                                                                                                                                 |
| Veterinary healthcare                 | Vet on site; Contracted external vet; By owner; No treatments; Unknown                                                                                         |
| Observed behavioural problems         | Ratio of animals at one venue displaying behavioural anomalies: > 75% of animals; 50-75% of animals; 25-49% of animals; < 25% of animals; No animals           |
| Types of behavioural problems         | Pacing; Weaving; Self-mutilation; Inactive; Hair-plucking; Aggression; Teeth-grinding Licking; Other                                                           |
| Observed health problems              | Ratio of animals at one venue displaying health problems: >75% of animals; 50-75% of animals; 25-49% of animals; <25% of animals; No animals                   |
| Types of health problems              | Underweight; Overweight; Skin problem; Wound; Nail cracks; Toe abscesses; Limping; CNS; Other                                                                  |
| Enclosure/cage size                   | 1-10sqm; 10-50sqm; 50-200sqm; 200-2;000sqm; 2;000-10;000sqm; >10;000sqm                                                                                        |
| Shelter type                          | No shelter; Single tree; Natural dense canopy; Mesh net roof; Fixed roof                                                                                       |
| Shelter floor quality                 | Concrete; Mesh wire; Natural ground                                                                                                                            |
| Environment quality                   | Urban/Town; Rural; Field; Forest                                                                                                                               |
| Social interaction of animals         | None; Visual/Audio; Tactile + Visual/Audio; Kept in social group                                                                                               |
| Feed type (Elephants)                 | Pineapple fruit; Pineapple leaves; Banana fruit; Banana leaves/stem; Bamboo; Cucumber; Corn; Grass/Hay; Sugarcane; Processed food; Other 1.; Other 2.; Unknown |
| Feed amount (Elephants)               | <75kg per 1000kg BDW; 75-100kg per 1000kg BDW; Ad libitum; Unknown                                                                                             |
| Drinking Water                        | Only sporadic; Regularly supplied; Free access                                                                                                                 |
| Washing (Elephants)                   | No bath/showers; Water hose shower; Supervised bath; Free bath at multiple times                                                                               |
| Ownership (Elephants)                 | Venue owned; Mahout owned; Rented; Unknown                                                                                                                     |
| If venue owned - how acquired         | Monetary purchase; Alternative livelihood exchange; Rescue/Confiscation/Donation; Unknown                                                                      |
| Entertainment                         | Trekking/Rides; Show; Washing/Bathing; Feeding; Be-a-Mahout; Petting; Photo-opportunities; Cub feeding; Clear policy against use of animals in entertainment   |
| # of animals used for entertainment   | Number (#) of animals used for: Show; Photo opportunities; Cub feeding; Petting/Posing; Riding; Be-a-Mahout                                                    |
| Shows per day                         | 1; 2-3; >3                                                                                                                                                     |
| Trekking                              | Uncoated saddle rope; Insufficient cushioning; > 3 people riding; Through natural habitat; Through village/town/park; ONLY without saddle                      |
| Working hours                         | >8 hours; 6-8 hours; <6 hours; no working hours                                                                                                                |
