# Supplementary material for: Asian Elephant (Elephas maximus), Pig-Tailed Macaque (Macaca nemestrina) and Tiger (Panthera tigris) Populations at Tourism Venues in Thailand and Aspects of Their Welfare
Source: PLOS journal article supplement (doi:10.1371/journal.pone.0139092), 2015-09-25
Supplement: S3 (10.1371/journal.pone.0139092.s003) [file journal.pone.0139092.s003]

**S3 Table: Definitions of terms used in this study.**

| <b>Term</b>                           | <b>Definition</b>                                                                                                                                                                        |
|---------------------------------------|------------------------------------------------------------------------------------------------------------------------------------------------------------------------------------------|
| <b>Chained husbandry</b>              | Animals are restrained by chains (one-legged or two-legged ankle chains with lengths of less than 5m for elephants, collar-chains for macaques and tigers)                               |
| <b>Solitary husbandry</b>             | Animals are kept for most of the day under conditions that do not allow opportunities for tactile interaction, such as grooming or social bounding                                       |
| <b>Shelter</b>                        | Any natural or artificial structure that the animal has access to and that allows it to avoid exposure to direct sunlight and weather                                                    |
| <b>Pacing stereotypy</b>              | Continuous back and forth walking along the same path for at least three repetitions                                                                                                     |
| <b>Weaving stereotypy</b>             | Continuously shifting weight from one body side to the other while standing in one place, often accompanied by swinging the head                                                         |
| <b>Self-mutilation stereotypy</b>     | Self-inflicting injury and physical harm through biting of limbs or tails, or hitting the head against a wall                                                                            |
| <b>Hair plucking stereotypy</b>       | Continuous plucking of hair on limbs or other body parts, leading to bald patches or irritated skin                                                                                      |
| <b>Licking stereotypy</b>             | Continuous licking of the same spot on a body part in absence of injury, leading to hair loss and irritated skin                                                                         |
| <b>Other behaviour stereotypies</b>   | Includes all other recognized stereotypic movements such as head bobbing (up and down movement of the head), spinning, bouncing or self-clasping                                         |
| <b>Teeth grinding behaviour</b>       | Animals are grinding their teeth, producing a notable sound                                                                                                                              |
| <b>Aggressive behaviour</b>           | Animals display unusual amount of aggression towards conspecies, visitors or keepers, such as charging, showing teeth or hissing                                                         |
| <b>Irresponsive behaviour</b>         | Animals that are awake do not react at all to events in the environment and do not interact with any object or animal for at least 5min                                                  |
| <b>Animal show attraction</b>         | Animals are regularly made to perform various unnatural activities, such as balancing on two legs, riding tricycles, painting, or walking on tight-ropes within an arena for an audience |
| <b>Washing/bathing attraction</b>     | Visitors are permitted to wash an animal under guidance by animal supervisors                                                                                                            |
| <b>Photo opportunities attraction</b> | Visitors are allowed to pose for a photograph with restrained animals reserved for this purpose, e.g. tigers, orang-utans, macaques                                                      |
| <b>Cub feeding attraction</b>         | Tiger cubs, previously removed from their mothers, are being presented to tourists to be fed with prepared milk formulation                                                              |
| <b>Be-a-mahout attraction</b>         | Elephants are being assigned a tourist to handle it under supervision by a mahout for a half or full day                                                                                 |
